# Supplementary material
Source: publisher figshare collection journal article supplement (https://acs.figshare.com/ndownloader/files/31066125)
Supplement: Supplementary file 1 [file 31066125]

# Supporting Information

Residual-solvent-induced morphological transformation  
by intense pulsed light on spin-coated and inkjet-printed  
ZnO NP films for quantum-dot light-emitting diodes

*Young Joon Han<sup>†</sup>, Kyung-Tae Kang<sup>†</sup>, and Kwan Hyun Cho<sup>\*,†</sup>*

<sup>†</sup>Manufacturing Process Platform R&D Department, Korea Institute of Industrial Technology  
(KITECH), 143, Hanggaui-ro, Sangnok-gu, Ansan-si, 15588, Republic of Korea

E-mail: [khcho@kitech.re.kr](mailto:khcho@kitech.re.kr)

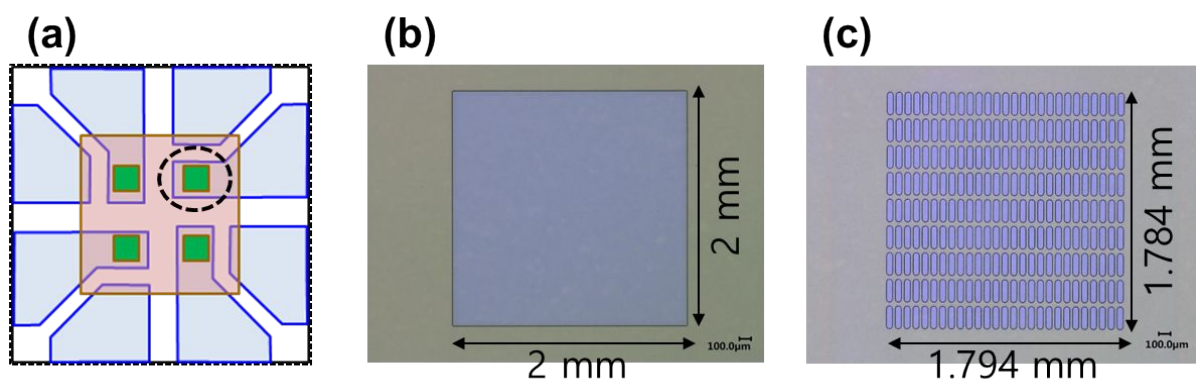

**Figure S1. Device substrate with four emitting areas with an insulator thickness of 1.5  $\mu\text{m}$  (a). An optical microscope image of an emitting layer 2 mm x 2 mm in size without a pixel define layer (PDL) for the spin-coating device (b) and 1.784mm x 1.794mm in size with a PDL for the inkjet-printing device (c).**

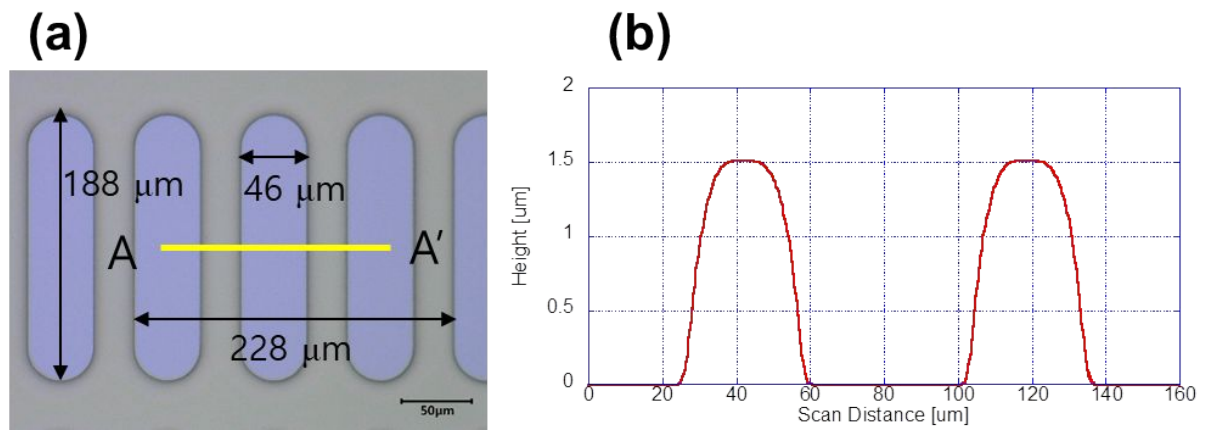

**Figure S2. An optical microscope image of the PDL for the inkjet-printing device (a) and the depth profile measured by the alpha-step method at A-A' (b).**

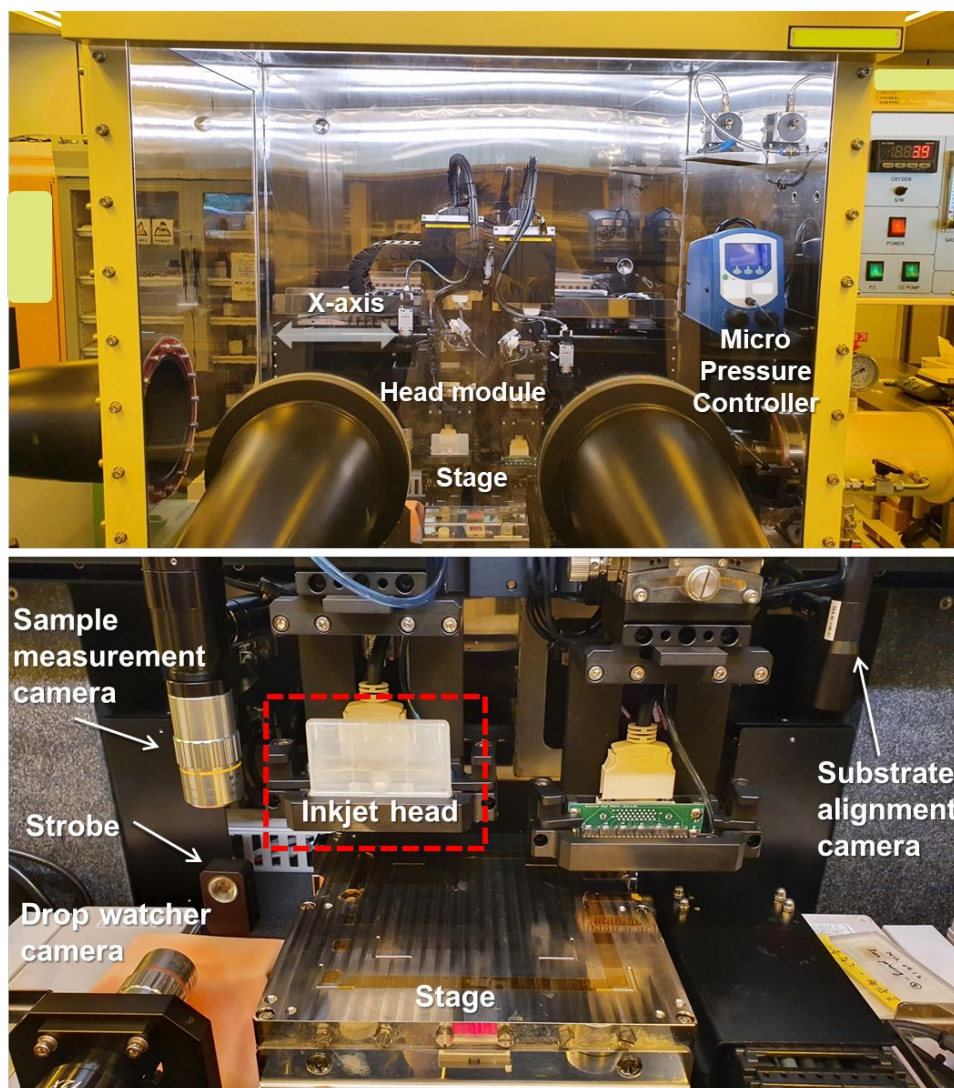

**Figure S3. The outside (upper) and the inside (lower) of the inkjet-printing system (Marvel Engineering, Korea) equipped in a glove box.**

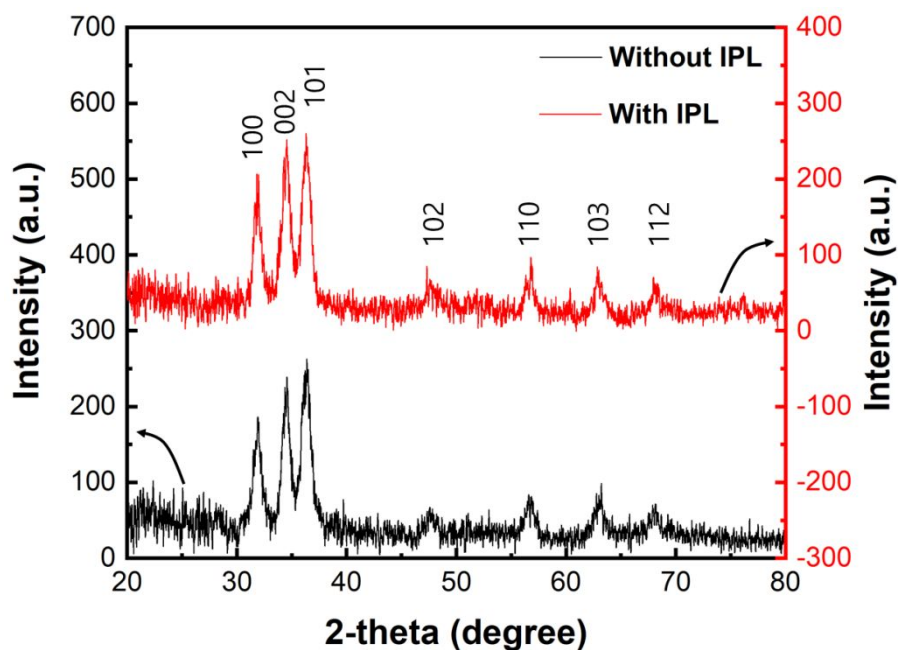

**Figure S4. X-ray diffraction (XRD) analysis of the ZnO NPs thin-film without and with IPL post-treatment. Multi-Purpose Thin-Film X-Ray Diffractometer (Rigaku Americas Corporation, USA) was used for the analyzing the grazing incidence X-ray diffraction (GI-XRD).**

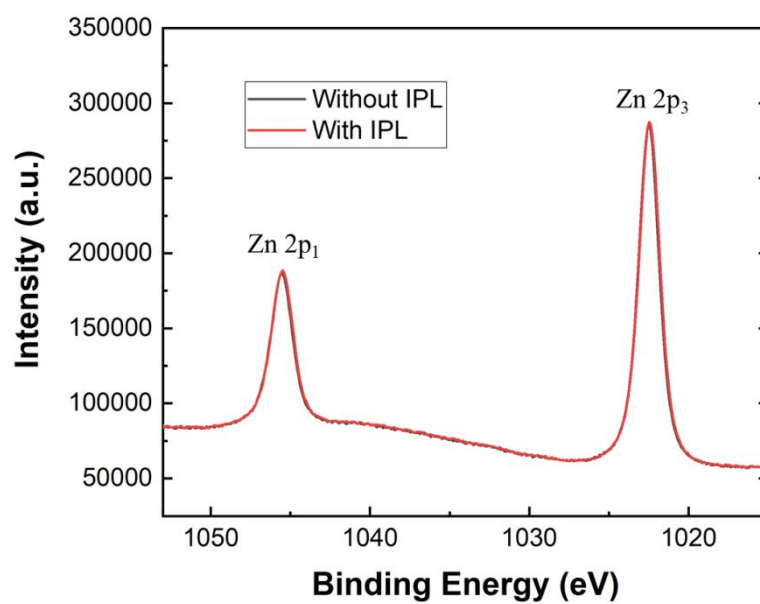

**Figure S5. X-ray photoelectron spectroscopy (XPS) of Zn 2p without and with IPL post-treatment. A K-alpha+ XPS (Thermo Fisher Scientific, USA) was used to measure the binding energies.**

**Table S1. Luminance and efficiency characteristics of spin-coated and inkjet-printed QLEDs depending on the annealing temperature condition.**

|                                     | Annealing temperature condition | Spin coated QLED | Inkjet printed QLED |
|-------------------------------------|---------------------------------|------------------|---------------------|
| <b>Luminance (cd/m<sup>2</sup>)</b> | 0 °C                            | 61,558           | Not measured        |
|                                     | 40 °C                           | 68,038           | Not measured        |
|                                     | 60 °C                           | 115,337          | 33,847              |
|                                     | 80 °C                           | 107,606          | 41,535              |
|                                     | 100 °C                          | 68,911           | 25,316              |
| <b>CE (cd/A)</b>                    | 0 °C                            | 21.5407          | Not measured        |
|                                     | 40 °C                           | 21.1087          | Not measured        |
|                                     | 60 °C                           | 29.8512          | 7.4888              |
|                                     | 80 °C                           | 27.5038          | 8.8746              |
|                                     | 100 °C                          | 23.6985          | 6.6898              |
| <b>EQE (%)</b>                      | 0 °C                            | 5.472            | Not measured        |
|                                     | 40 °C                           | 5.464            | Not measured        |
|                                     | 60 °C                           | 7.477            | 2.126               |
|                                     | 80 °C                           | 7.128            | 2.472               |
|                                     | 100 °C                          | 6.142            | 1.683               |

**Table S2. Luminance and efficiency characteristics of spin-coated QLEDs depending on the individual annealing temperature conditions from the initial to the eighth day.**

| Annealing temperature condition | Measured day | Luminance (cd/m <sup>2</sup> ) | CE (cd/A) | EQE (%) |
|---------------------------------|--------------|--------------------------------|-----------|---------|
| <b>0 °C</b>                     | Initial      | 61,558                         | 21.5407   | 5.472   |
|                                 | After 1 day  | 43,699                         | 18.6572   | 4.950   |
|                                 | After 2 days | 35,682                         | 17.9846   | 4.604   |
|                                 | After 4 days | 24,010                         | 14.3781   | 3.755   |
|                                 | After 6 days | Not measured                   |           |         |
|                                 | After 8 days | Not measured                   |           |         |
| <b>40 °C</b>                    | Initial      | 68,038                         | 21.1087   | 5.464   |
|                                 | After 1 day  | 65,837                         | 21.6230   | 5.604   |
|                                 | After 2 days | 61,242                         | 20.8573   | 5.535   |
|                                 | After 4 days | 54,879                         | 20.9172   | 5.465   |
|                                 | After 6 days | 38,505                         | 19.3967   | 5.068   |
|                                 | After 8 days | 30,702                         | 18.2397   | 4.718   |
| <b>60 °C</b>                    | Initial      | 115,337                        | 29.8320   | 7.731   |
|                                 | After 1 day  | 114,822                        | 30.3880   | 7.977   |
|                                 | After 2 days | 110,845                        | 29.5113   | 7.711   |
|                                 | After 4 days | 106,117                        | 29.8135   | 7.826   |
|                                 | After 6 days | 104,996                        | 29.8786   | 7.809   |
|                                 | After 8 days | 100,409                        | 29.2911   | 7.561   |
| <b>80 °C</b>                    | Initial      | 107,606                        | 27.5038   | 7.128   |
|                                 | After 1 day  | 106,430                        | 27.6264   | 7.159   |
|                                 | After 2 days | 104,676                        | 29.0269   | 7.325   |
|                                 | After 4 days | 100,850                        | 28.6825   | 7.491   |
|                                 | After 6 days | 90,348                         | 28.1634   | 7.355   |
|                                 | After 8 days | 88,874                         | 28.0074   | 7.094   |
| <b>100 °C</b>                   | Initial      | 68,911                         | 23.6985   | 6.142   |
|                                 | After 1 day  | 64,582                         | 23.1606   | 6.002   |
|                                 | After 2 days | 56,407                         | 23.3805   | 6.106   |



|              |        |         |       |
|--------------|--------|---------|-------|
| After 4 days | 52,040 | 23.6257 | 6.174 |
| After 6 days | 44,690 | 22.9411 | 5.996 |
| After 8 days | 40,885 | 23.3731 | 5.684 |

**Table S3. Luminance and efficiency characteristics of inkjet-printed QLEDs depending on the individual annealing temperature conditions from the initial to the eighth day.**

| Annealing temperature condition | Measured day | Luminance (cd/m <sup>2</sup> ) | CE (cd/A) | EQE (%) |
|---------------------------------|--------------|--------------------------------|-----------|---------|
| 60 °C                           | Initial      | 33,847                         | 7.6266    | 2.182   |
|                                 | After 1 day  | 32,541                         | 7.5695    | 2.173   |
|                                 | After 2 days | 31,537                         | 7.4701    | 2.104   |
|                                 | After 4 days | 30,541                         | 7.4572    | 2.098   |
|                                 | After 6 days | 29,102                         | 7.3003    | 2.053   |
|                                 | After 8 days | 27,593                         | 7.3945    | 2.124   |
| 80 °C                           | Initial      | 41,535                         | 8.8746    | 2.472   |
|                                 | After 1 day  | 38,588                         | 8.7786    | 2.473   |
|                                 | After 2 days | 37,614                         | 8.7239    | 2.479   |
|                                 | After 4 days | 36,107                         | 8.6588    | 2.446   |
|                                 | After 6 days | 33,479                         | 8.4305    | 2.352   |
|                                 | After 8 days | 32,001                         | 8.5132    | 2.405   |
| 100 °C                          | Initial      | 25,316                         | 6.6898    | 1.683   |
|                                 | After 1 day  | 23,045                         | 6.7389    | 1.639   |
|                                 | After 2 days | 21,077                         | 6.7667    | 1.677   |
|                                 | After 4 days | 17,781                         | 6.6113    | 1.606   |
|                                 | After 6 days | 13,911                         | 6.3716    | 1.537   |
|                                 | After 8 days | 11,986                         | 6.3811    | 1.572   |
